# Supplementary material for: A comprehensive prognostic and immunological analysis of hexokinase domain containing protein-1 (HKDC1) in pan-cancer
Source: PeerJ. 2025 Mar 19;13:e19083. doi: 10.7717/peerj.19083 (PMC11929506; doi:10.7717/peerj.19083)
Supplement: Supplemental Information 4 — Gastric cancer knockout efficiency qPCR results . [file peerj-13-19083-s004.xls]

## Sheet: Sheet1
Sample name	Gene name	Cт
STAD NC	HKDC1	19.029
STAD NC	HKDC1	18.7526
STAD NC	HKDC1	19.4177
STAD si-HKDC1-1	HKDC1	24.1984
STAD si-HKDC1-1	HKDC1	23.552
STAD si-HKDC1-1	HKDC1	23.6768
STAD si-HKDC1-2	HKDC1	25.3035
STAD si-HKDC1-2	HKDC1	25.0023
STAD si-HKDC1-2	HKDC1	26.0342
STAD NC	β-Actin	17.7101
STAD NC	β-Actin	15.9737
STAD NC	β-Actin	16.3075
STAD si-HKDC1-1	β-Actin	10.9794
STAD si-HKDC1-1	β-Actin	12.1269
STAD si-HKDC1-1	β-Actin	15.711
STAD si-HKDC1-2	β-Actin	17.8319
STAD si-HKDC1-2	β-Actin	19.4951
STAD si-HKDC1-2	β-Actin	19.59
