# Supplementary material for: A comprehensive prognostic and immunological analysis of hexokinase domain containing protein-1 (HKDC1) in pan-cancer
Source: PeerJ. 2025 Mar 19;13:e19083. doi: 10.7717/peerj.19083 (PMC11929506; doi:10.7717/peerj.19083)
Supplement: Supplemental Information 5 — Breast cancer knockout efficiency qPCR results. [file peerj-13-19083-s005.xls]

## Sheet: Sheet1
Sample name	Gene name	Cт
BRCA NC	HKDC1	19.3134
BRCA NC	HKDC1	19.2139
BRCA NC	HKDC1	19.1749
BRCA si-HKDC1-1	HKDC1	24.434
BRCA si-HKDC1-1	HKDC1	23.3786
BRCA si-HKDC1-1	HKDC1	23.2059
BRCA si-HKDC1-2	HKDC1	21.9541
BRCA si-HKDC1-2	HKDC1	21.9126
BRCA si-HKDC1-2	HKDC1	22.0736
BRCA NC	Actin	14.0052
BRCA NC	Actin	14.0287
BRCA NC	Actin	15.8704
BRCA si-HKDC1-1	Actin	14.0531
BRCA si-HKDC1-1	Actin	15.3829
BRCA si-HKDC1-1	Actin	14.9854
BRCA si-HKDC1-2	Actin	14.0442
BRCA si-HKDC1-2	Actin	14.4149
BRCA si-HKDC1-2	Actin	15.1692
